# Supplementary material
Source: Springer Nature journal article supplement (https://www.springermedizin.de/resource/supplementary/12913_2006_493_MOESM8_ESM.pdf/9534868)

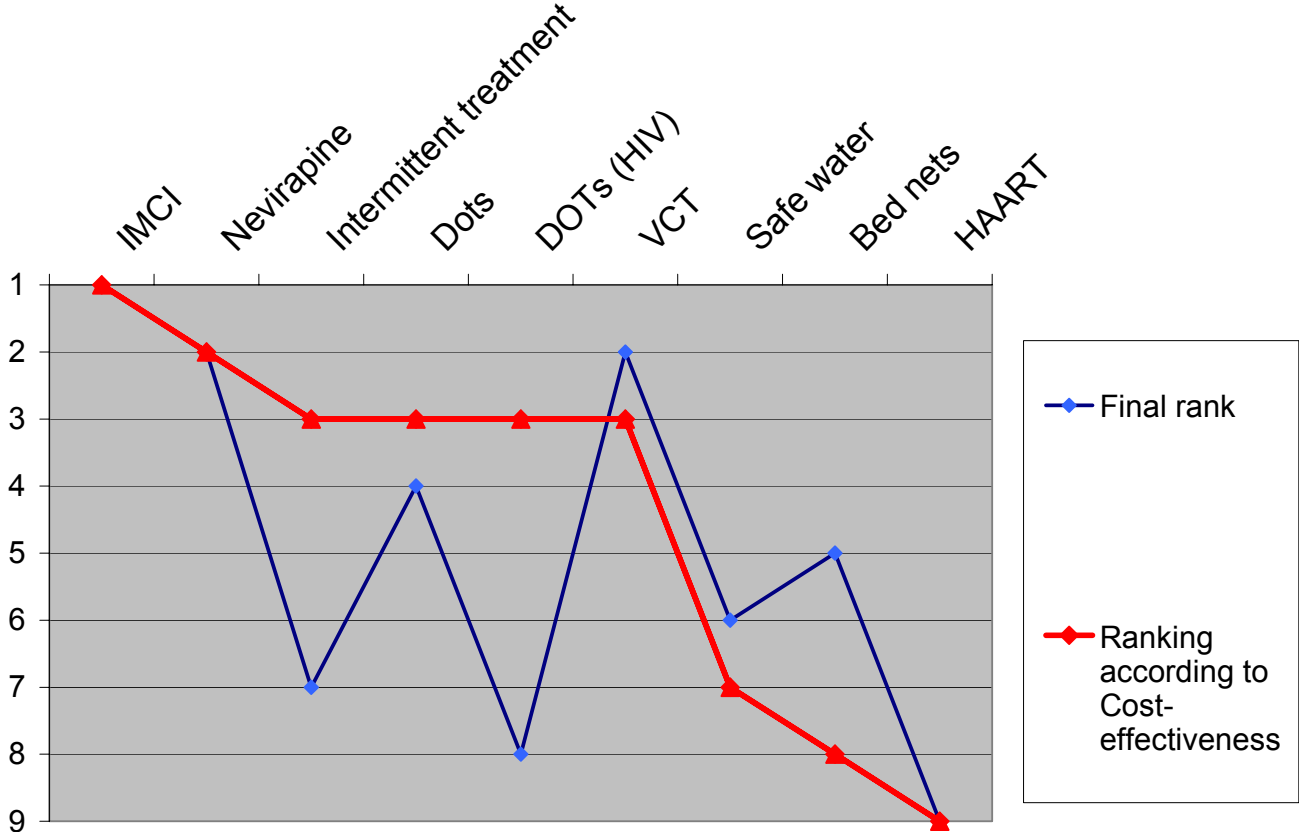

Supplement: MOESM8 [file 9534868]
